# Supplementary material for: Non-catalytic regioselective synthesis of trans bis-pyrrolo isoxazole cycloadducts in water
Source: Royal Society of Chemistry journal article supplement (doi:10.1039/d3su00396e), 2024-01-01
Supplement: d3su00396e1.pdf [file d3su00396e1.pdf]

## **Non-catalytic regioselective synthesis of trans bis-pyrrolo isoxazole cycloadducts**

Alhussein Arkan Majhool<sup>1</sup>, Assad Abbas Khalaf<sup>2</sup>, Iman Sabeeh Hasan<sup>3</sup>,  
Ranvijay Kumar<sup>4</sup>, Sandeep Kaushal<sup>5\*</sup>, Rahul Badru<sup>5\*</sup>

<sup>1</sup>Department of Environmental Health, College of Applied Medical Sciences, University of  
Karbala, Karbala, Iraq

<sup>2</sup>College of Nursing, University of Karbala, Karbala City, Iraq

<sup>3</sup>Department of Pharmacy, Al-Zahrawi University College, Karbala Iraq

<sup>4</sup>University centre of Research and Development, Chandigarh University, Gharuan, Mohali,  
Punjab, India

<sup>5</sup>Department of Chemistry, Sri Guru Granth Sahib World University, Fatehgarh Sahib,  
Punjab, India-140406

[rahulbadru@gmail.com](mailto:rahulbadru@gmail.com), [kaushalsandeep33@gmail.com](mailto:kaushalsandeep33@gmail.com)

### **Contents:**

**<sup>1</sup>H-NMR, <sup>13</sup>C-NMR and FTIR spectra of the synthesized compounds**

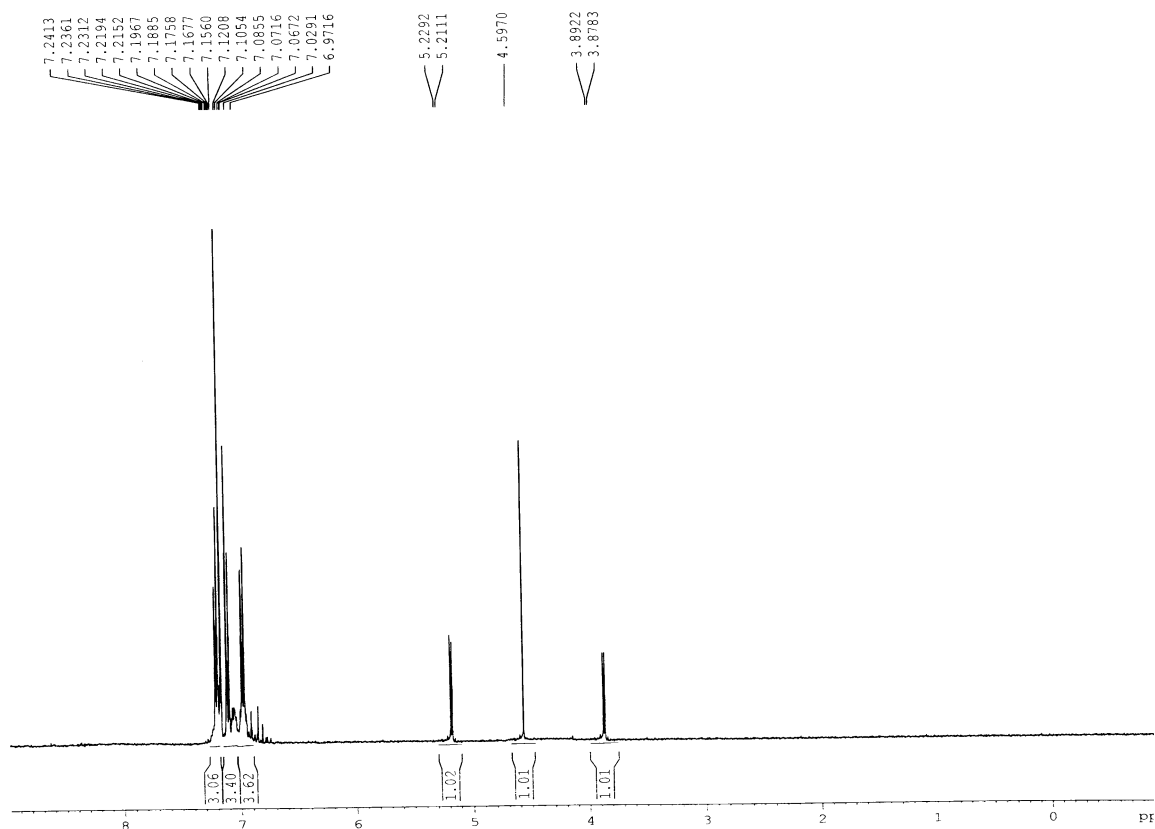

Figure 1.  $^1\text{H-NMR}$  spectrum of compound 3a

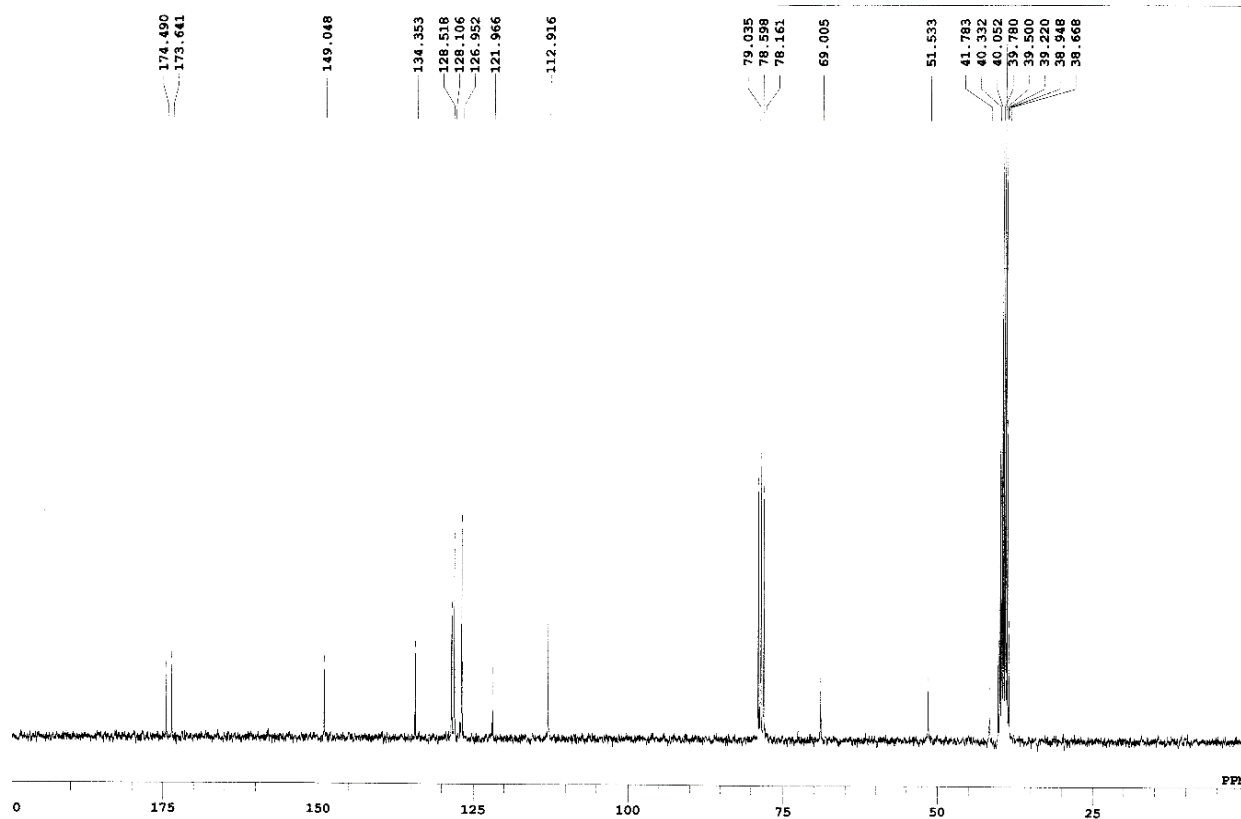

Figure 2.  $^{13}\text{C-NMR}$  spectrum of compound 3a

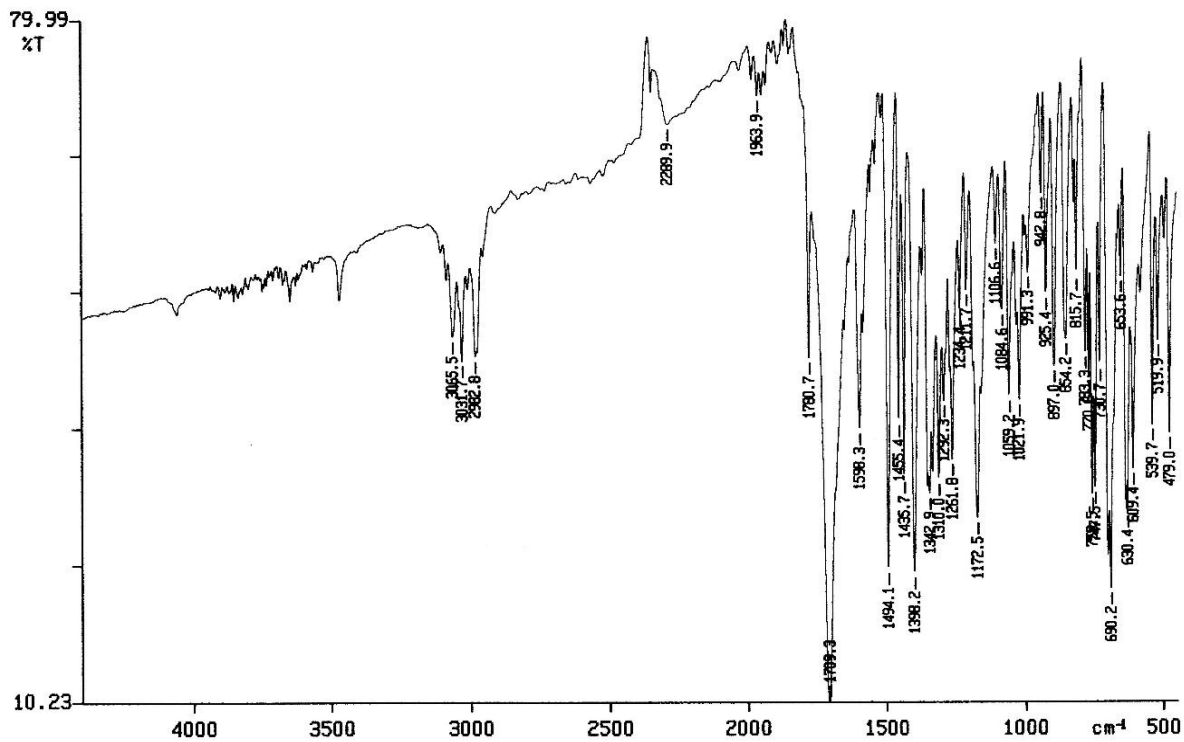

Figure 3. FTIR spectrum of compound 3a

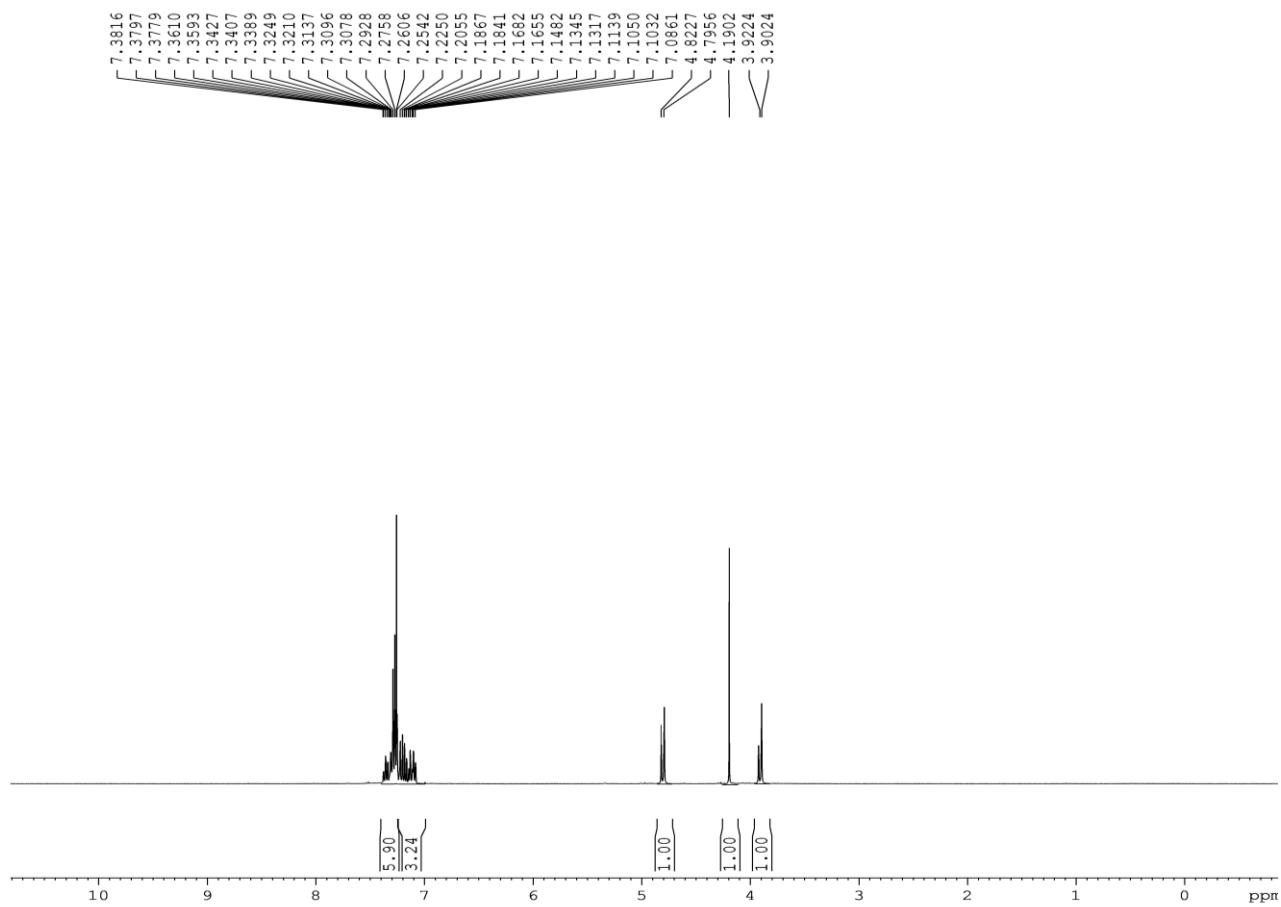

Figure 4. <sup>1</sup>H-NMR spectrum of compound 3c

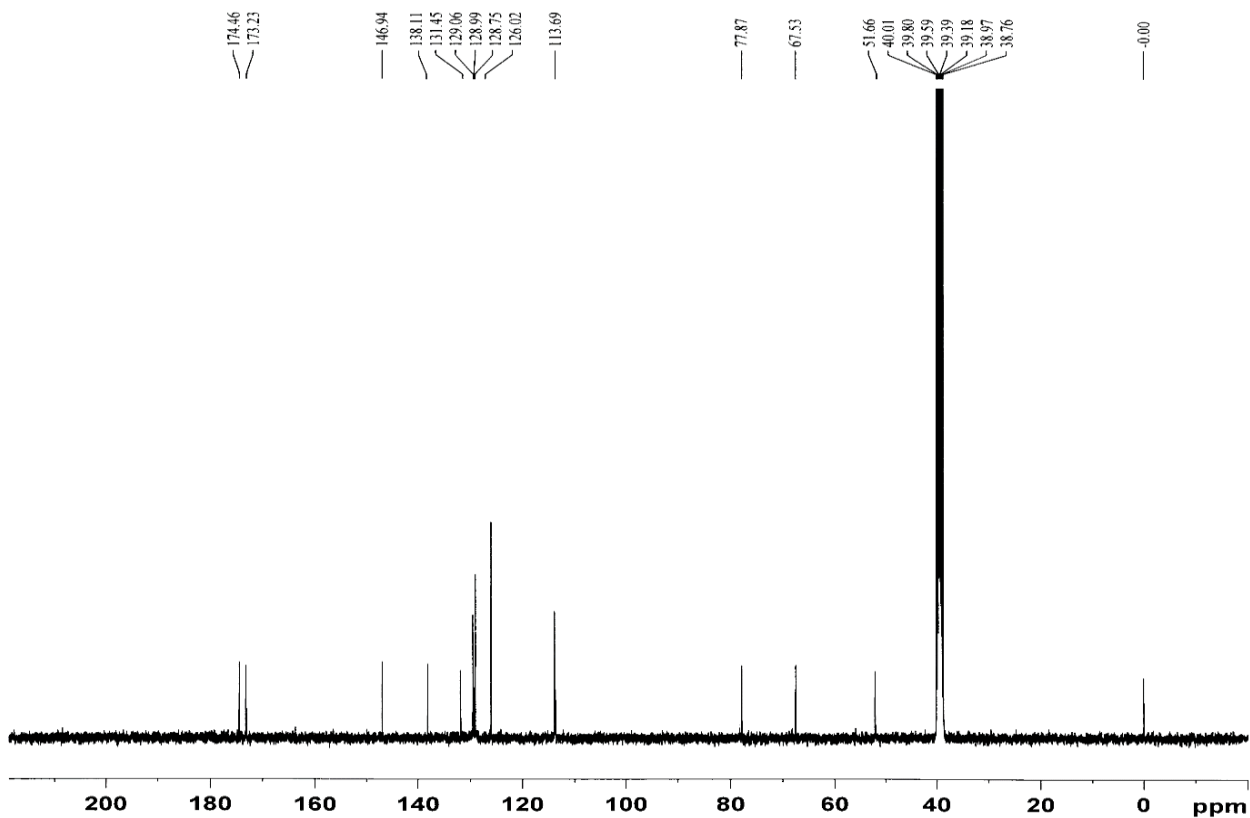

Figure 5.  $^{13}\text{C}$ -NMR spectrum of compound 3c

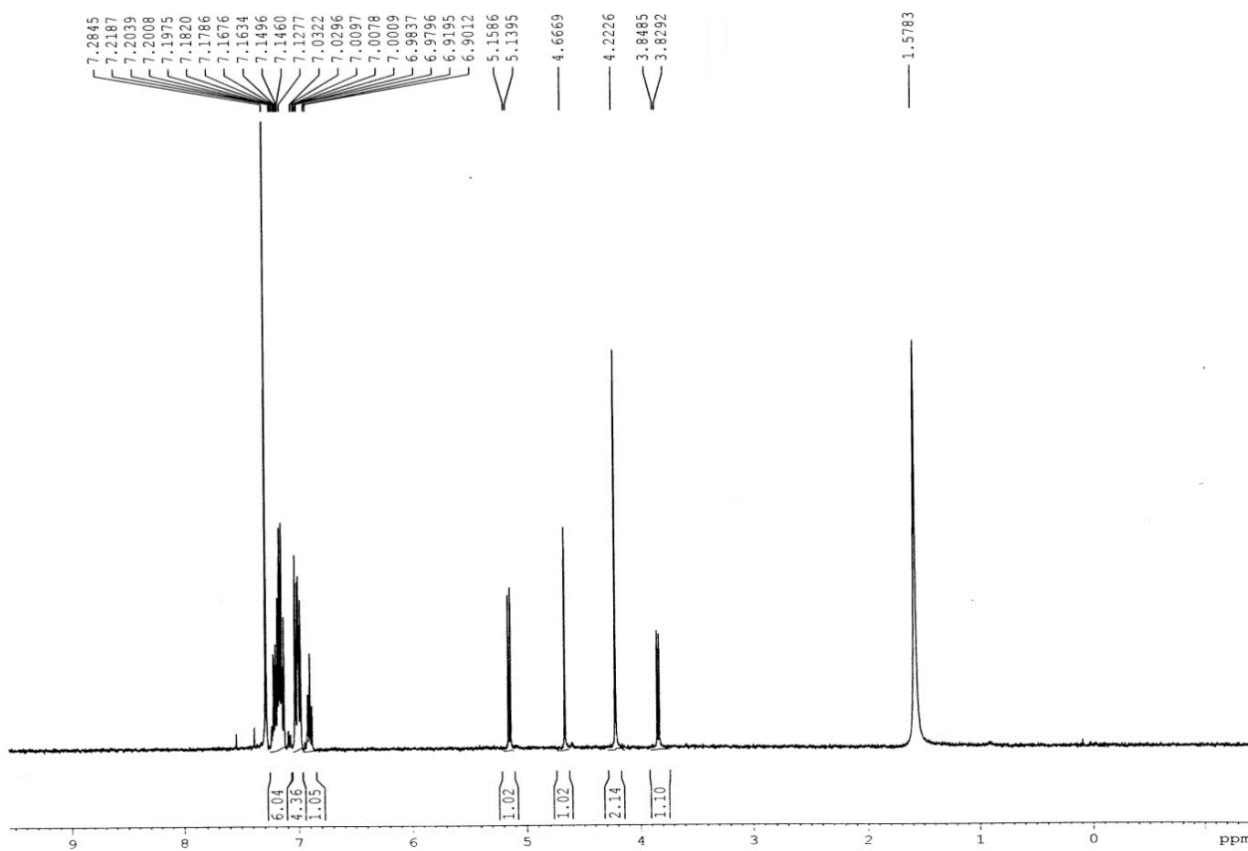

Figure 6.  $^1\text{H}$ -NMR spectrum of compound 3g

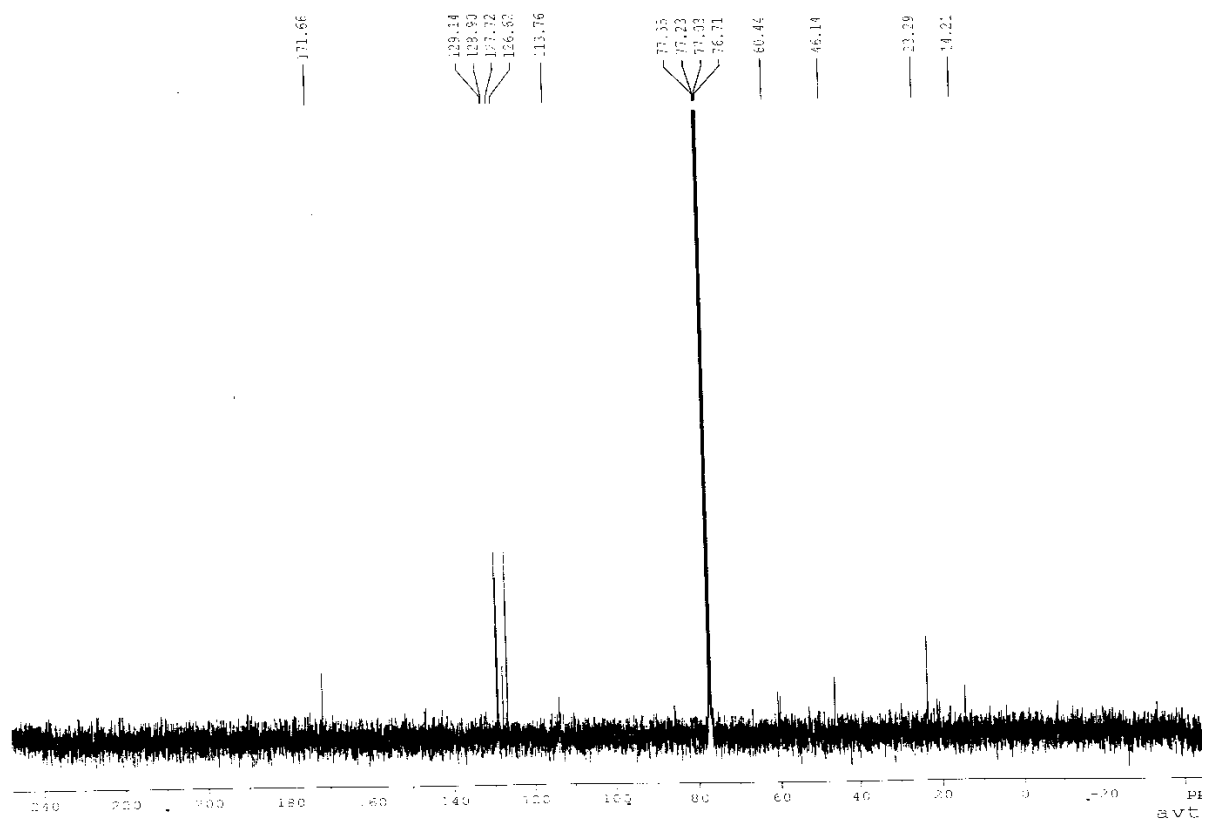

Figure 7.  $^{13}\text{C-NMR}$  spectrum of compound 3g

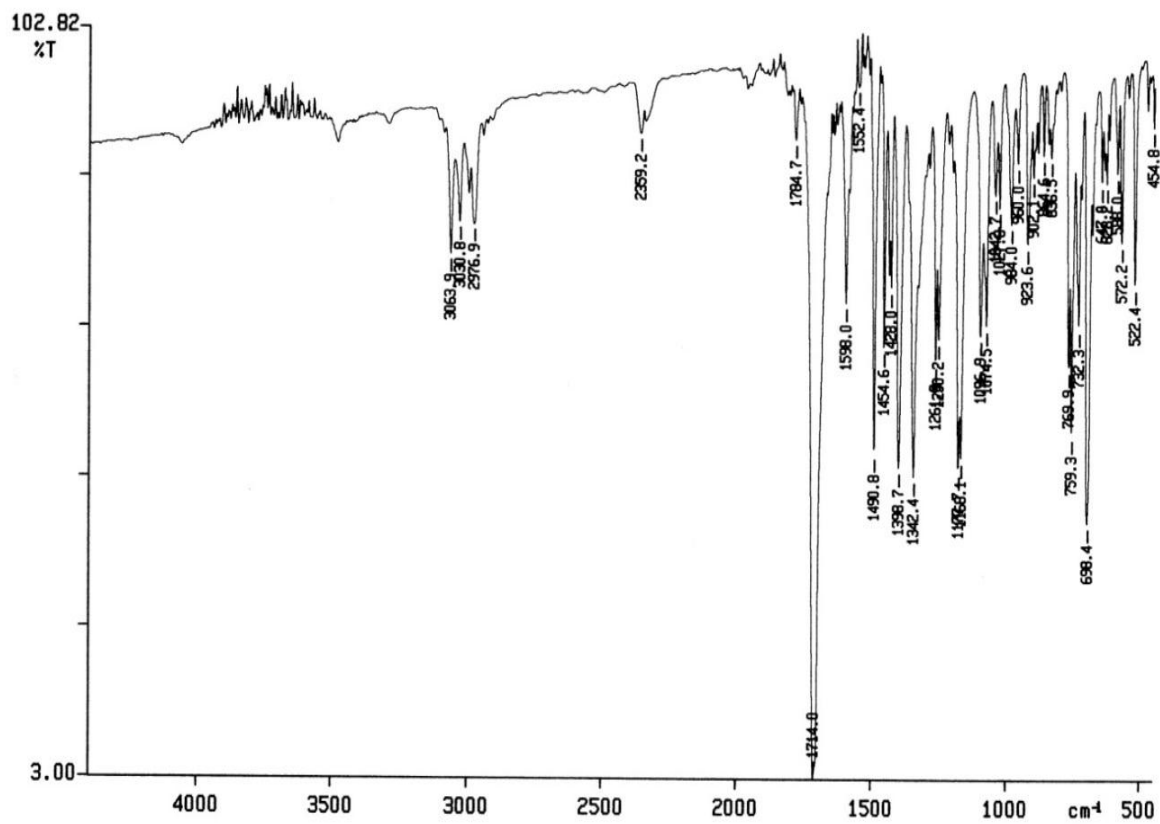

Figure 8. FTIR spectrum of compound 3g

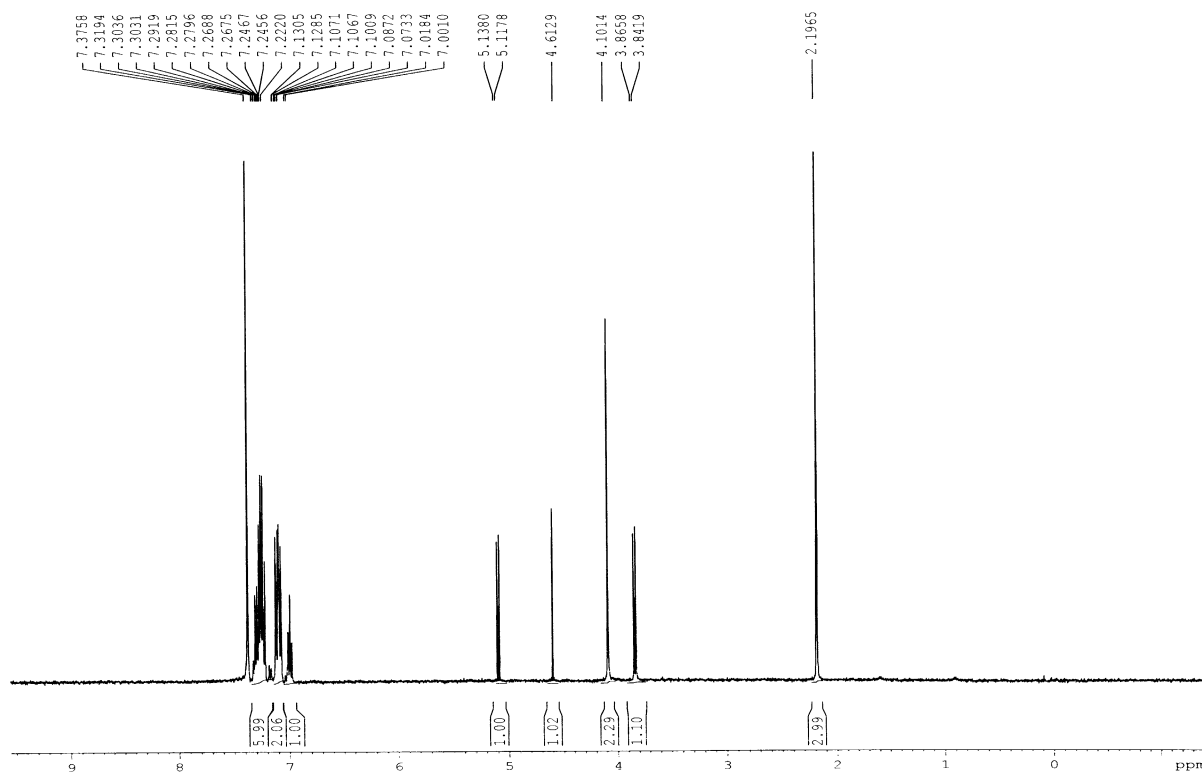

Figure 9.  $^1\text{H}$ -NMR spectrum of compound 3h

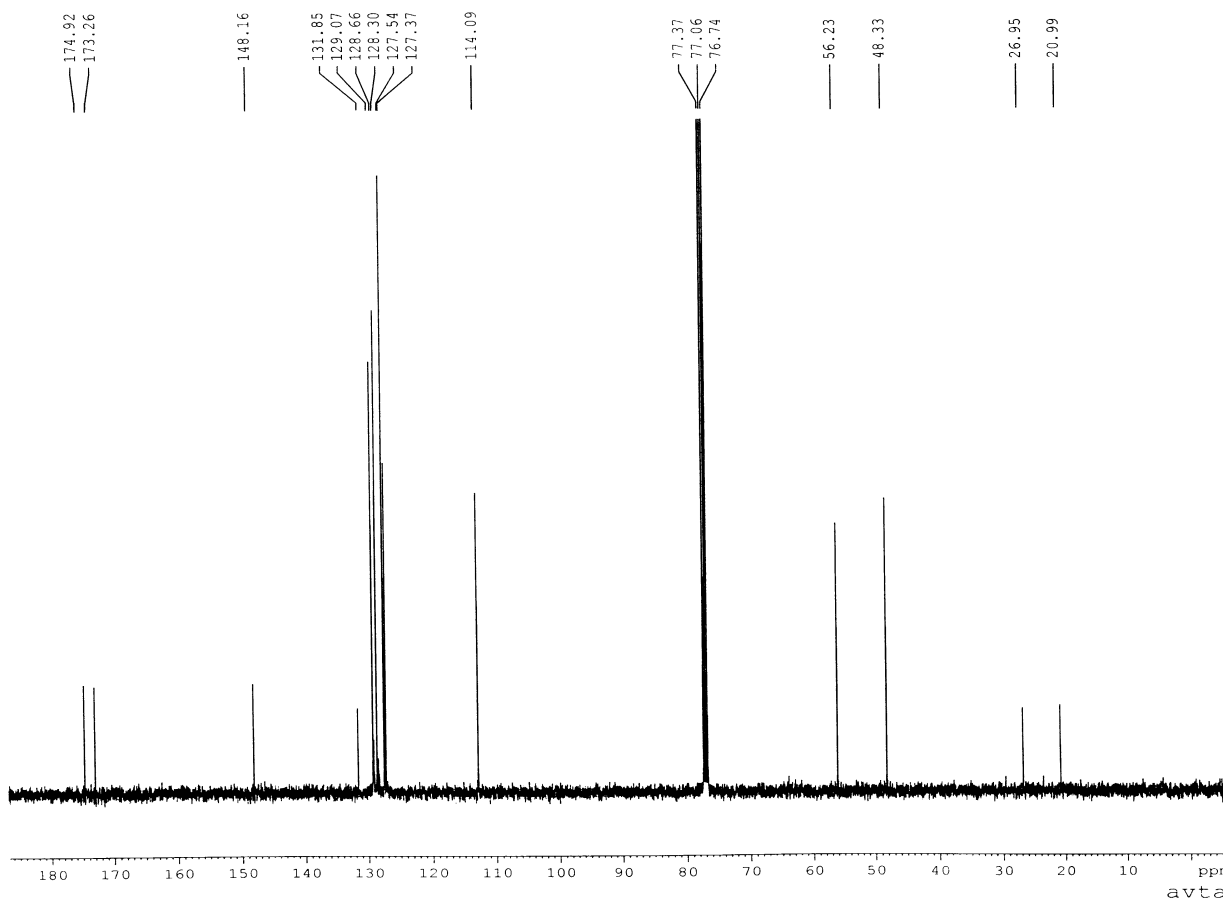

Figure 10.  $^{13}\text{C}$ -NMR spectrum of compound 3h

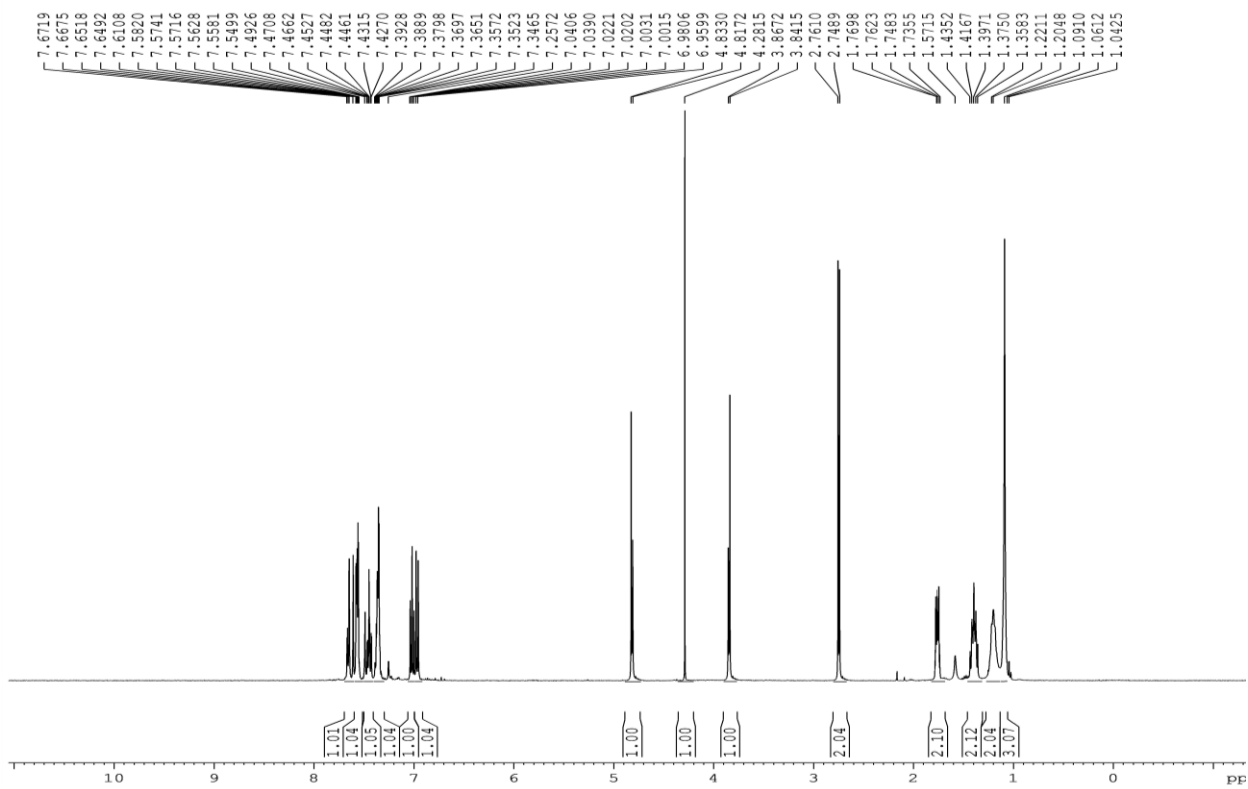

Figure 11.  $^1\text{H}$ -NMR spectrum of compound 3j

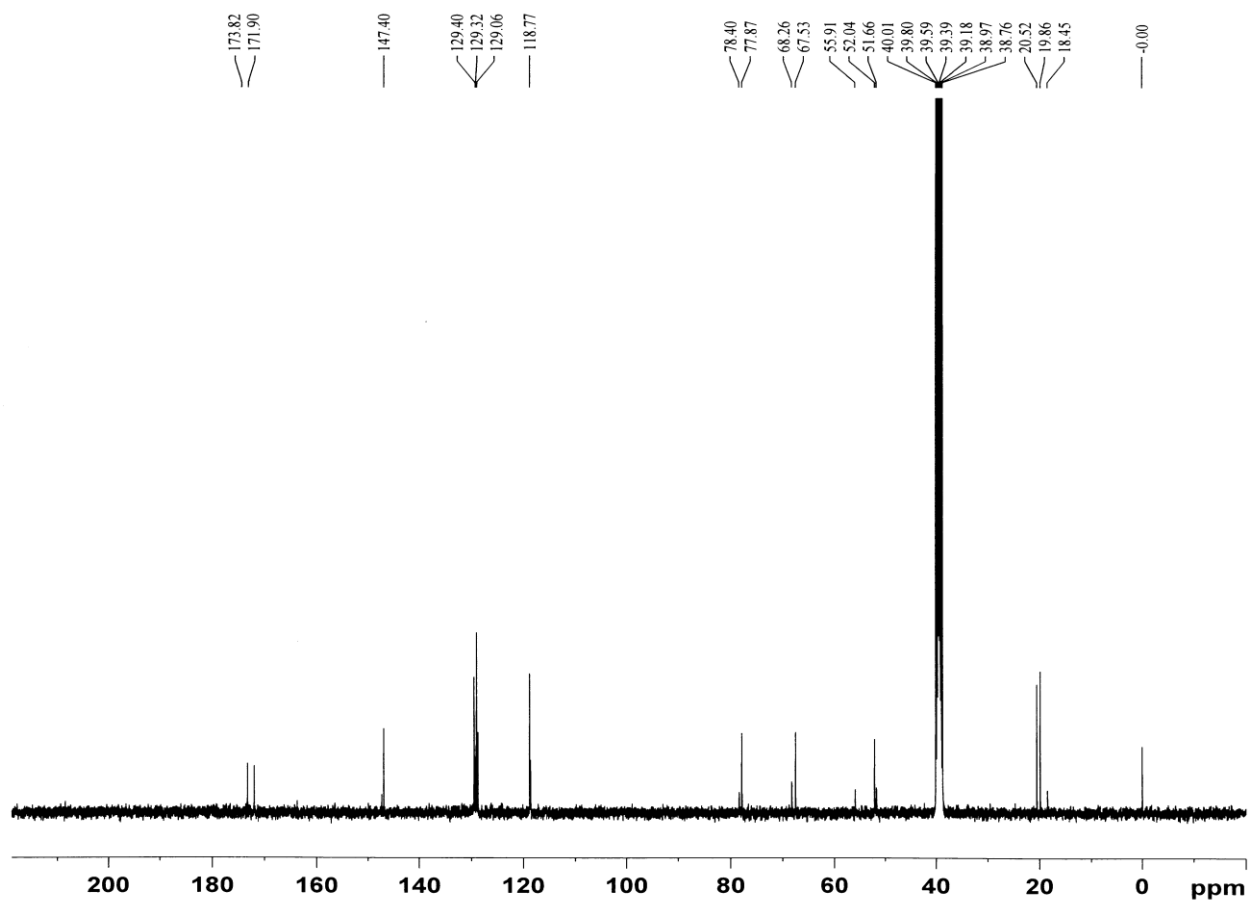

Figure 12.  $^{13}\text{C}$ -NMR spectrum of compound 3j

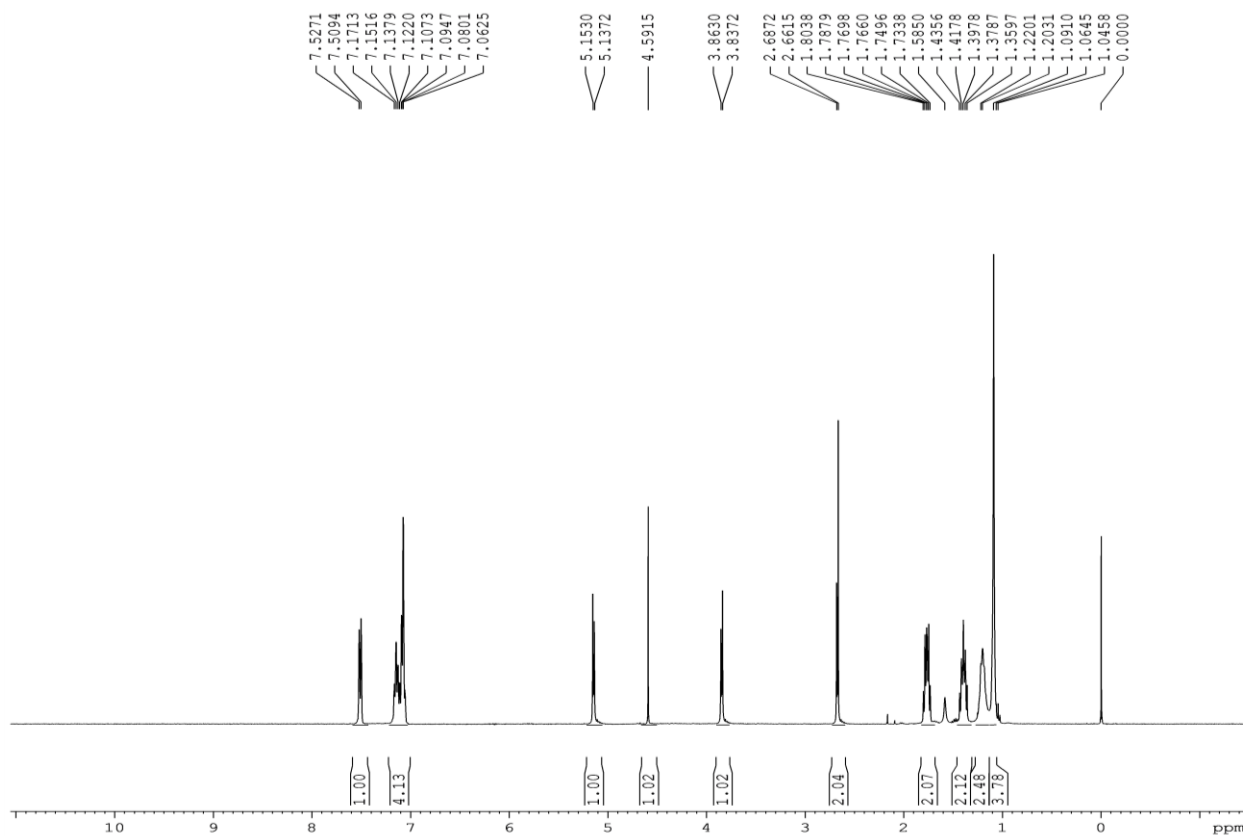

**Figure 13.**  $^1\text{H}$ -NMR spectrum of compound 31

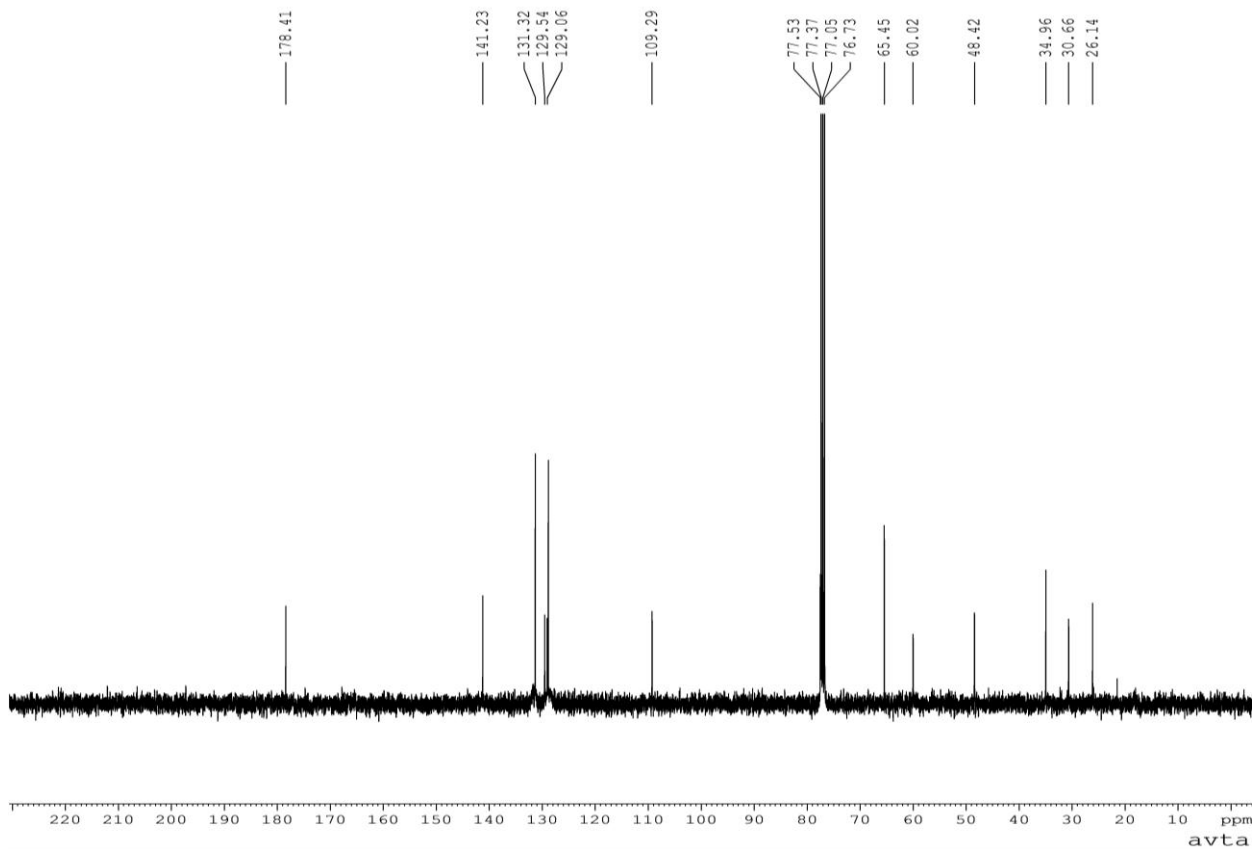

**Figure 14.**  $^{13}\text{C}$ -NMR spectrum of compound 31
